# Supplementary material
Source: PubMed Central journal article supplement (PMC4526345)
Supplement: NIHMS710511-supplement-Supporting_Information.pdf [file NIHMS710511-supplement-Supporting_Information.pdf]

**Design, Synthesis, and Evaluation of Polyamine Deacetylase Inhibitors, and High-Resolution Crystal Structures of their Complexes with Acetylpolyamine Amidohydrolase**

Christophe Decroos<sup>†</sup> and David W. Christianson<sup>\*,†</sup>

<sup>†</sup>Roy and Diana Vagelos Laboratories, Department of Chemistry, University of Pennsylvania,  
Philadelphia, PA 19104-6323 United States

\*author to whom correspondence should be sent: Tel. (215) 898-5714; E-mail  
chris@sas.upenn.edu

**— SUPPORTING INFORMATION —**

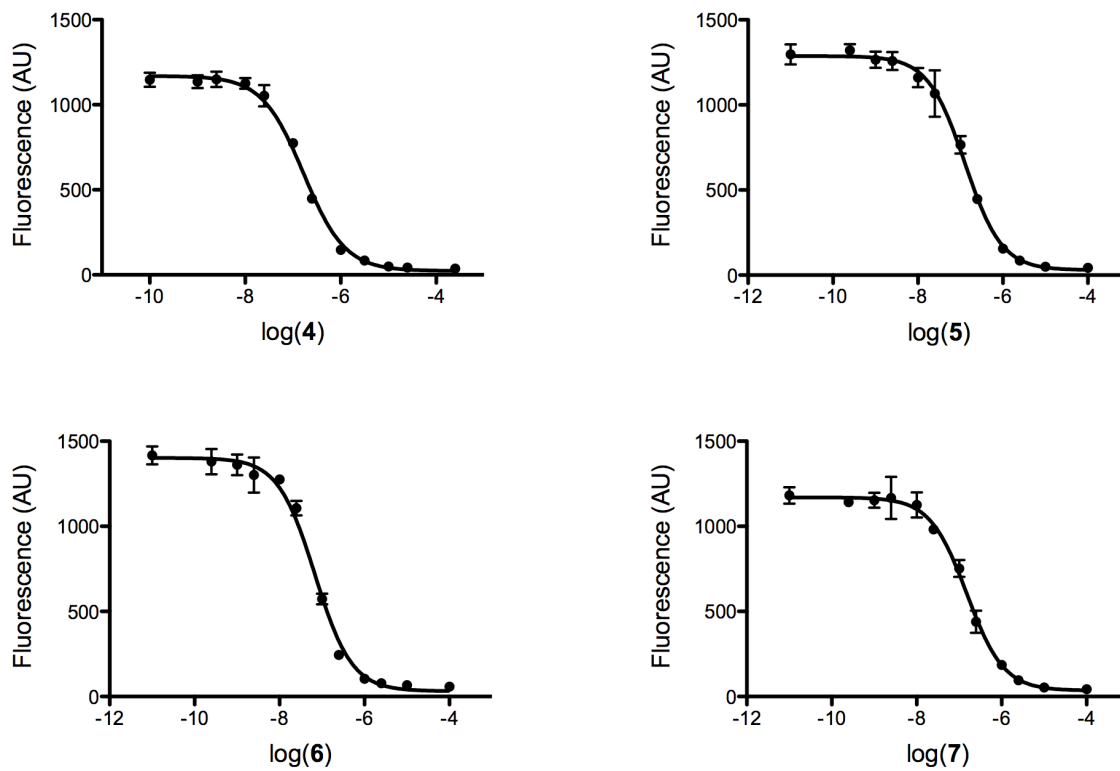

**Figure S1.** Inhibition of APAH from *Mycoplana ramosa* by compounds 4–7.

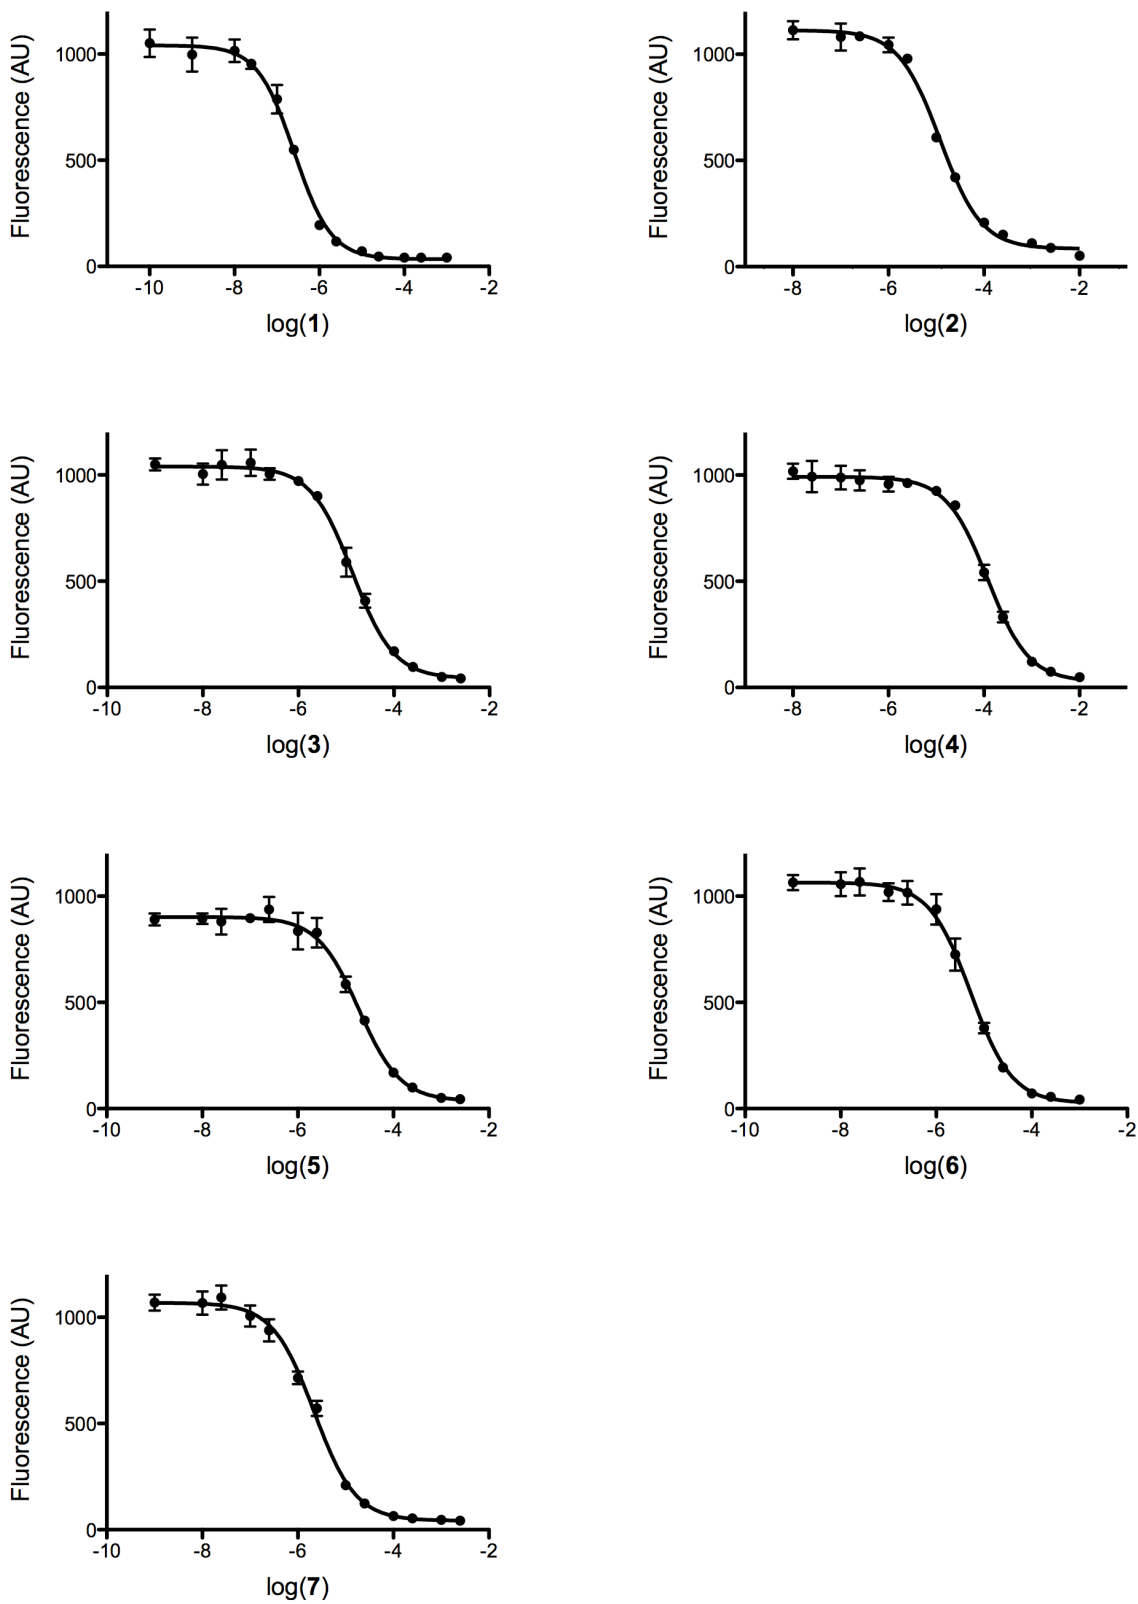

**Figure S2.** Inhibition of human HDAC8 by compounds 1–7.
